# Supplementary material for: Development of a dextrin–vitamin D3 micelle nanocarrier for the antimicrobial peptide LLKKK18 as a potential therapeutic agent for bone infections
Source: Royal Society of Chemistry journal article supplement (doi:10.1039/d4tb00903g), 2024-01-01
Supplement: d4tb00903g1.pdf [file d4tb00903g1.pdf]

Supplementary Information

**Development of a Dextrin-Vitamin D3 Micelle Nanocarrier for the  
Antimicrobial Peptide LLKKK18 as a potential therapeutic agent for  
Bone Infections**

Alexandra Machado<sup>1,2</sup>, Miguel Gama<sup>1,2</sup>, José Alberto Martins<sup>3\*</sup>

<sup>1</sup> Centre of Biological Engineering, University of Minho (CEB), Campus de Gualtar, 4710-057 Braga, Portugal.

<sup>2</sup> LABBELS - Associate Laboratory, Braga, Guimarães, Portugal

<sup>3</sup> Center of Chemistry, University of Minho, Campus de Gualtar, 4710-057 Braga, Portugal

\*Corresponding author

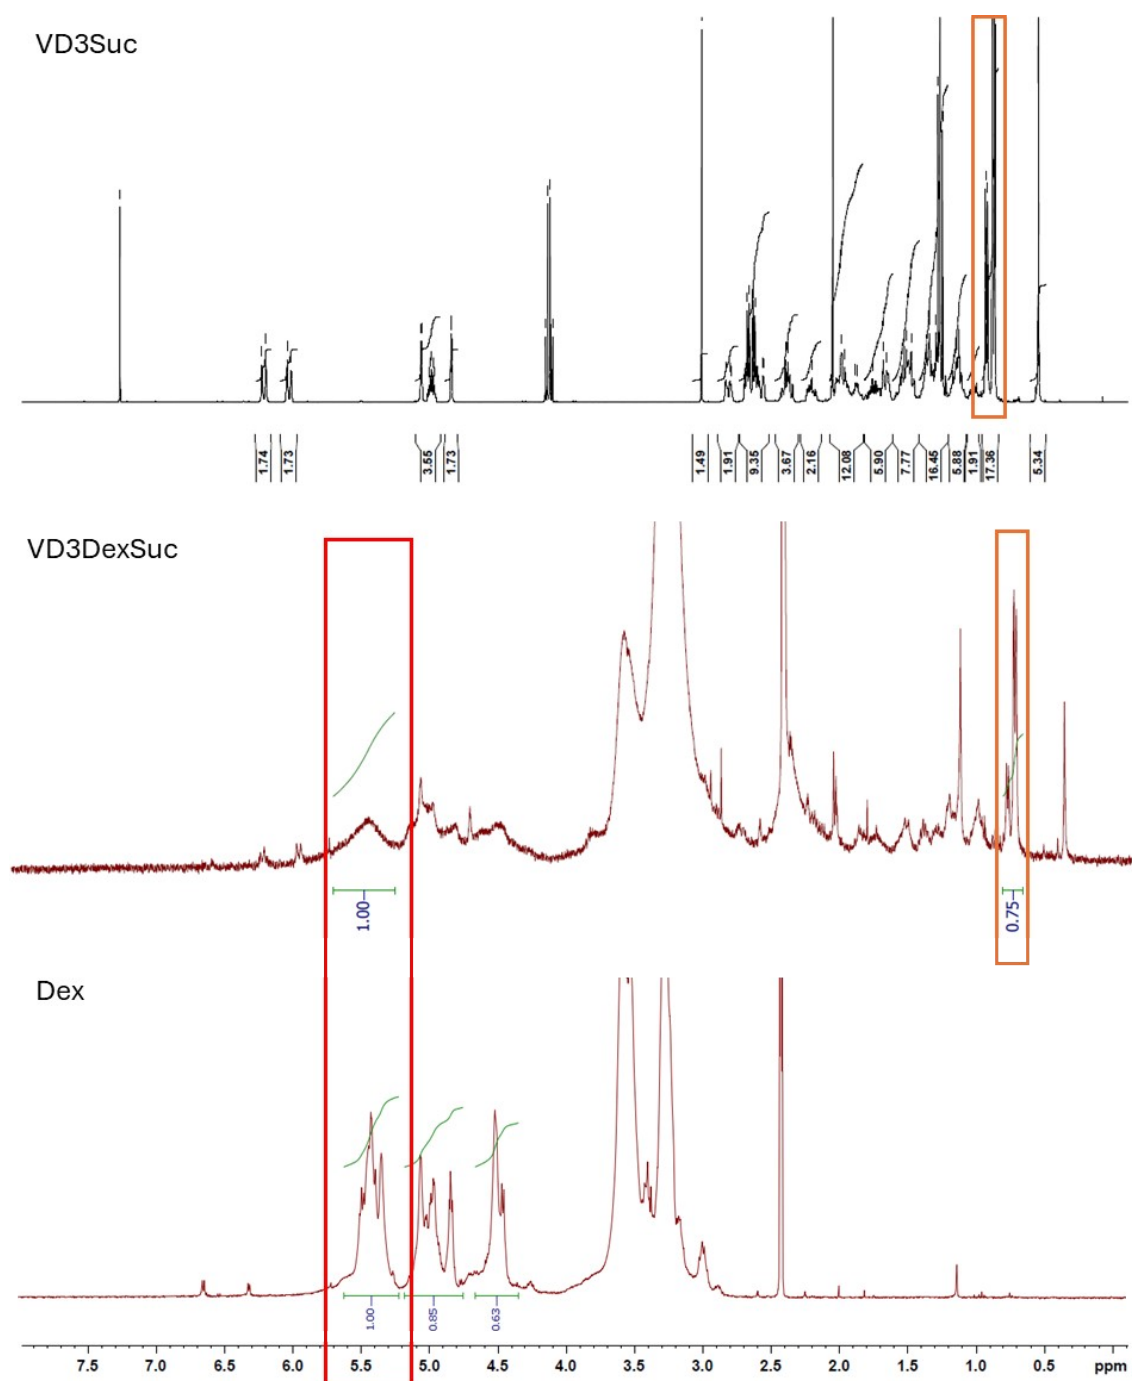

**Figure SI 1.**  $^1\text{H}$  NMR spectra: SucVD3 (400 MHz,  $\text{CDCl}_3$ ); conjugate VD3DexSuc (400 MHz,  $\text{DMSO}-d_6$ ) and Dextrin (400 MHz,  $\text{DMSO}-d_6$ ).

The signal at  $\delta$  5.3-5.8 ppm, can be assigned to the  $\alpha$ -anomeric protons of the glucose units of dextrin. Some signals can be clearly assigned to protons of the SucVD3 moiety, especially the duplet signals at  $\delta$  0.83 and 0.88 ppm, attributed to the isopropyl methyl groups and to the methyl group of the hydrocarbon chain of VD3, respectively. The broad multiplet signal  $\delta$  2.49 ppm, overlapped with the

residual DMSO signal, is assigned to methylene protons of the succinic acid linker of the SucVD3 moiety and to the pendant succinic acid groups (Figure 1 SI). The degree (percentage) of derivatization of the dextrin backbone with SucVD3 (8.3 %) was estimated by equation 1.

$$\text{Mol\% grafting of Dex with SucVD3} = \frac{\frac{0.75}{9}}{1} \times 100 = 8.3 \text{ mol\% (eq. 1)}$$

$x$  (0.75) represents the aggregated integration of the signals assigned to the methyl protons of the isopropyl group and to the methyl group of the hydrocarbon chain (9 protons) of SucVD3 and  $y$  (1.0) is the integration of the  $\alpha$ -anomeric protons of the glycosidic units (1 proton) of dextrin.

A

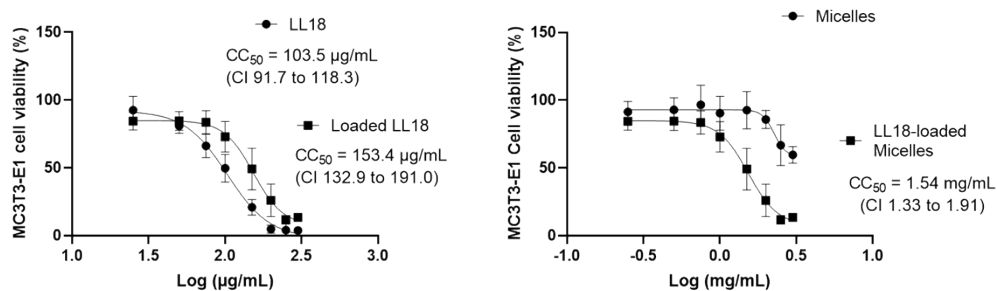

B

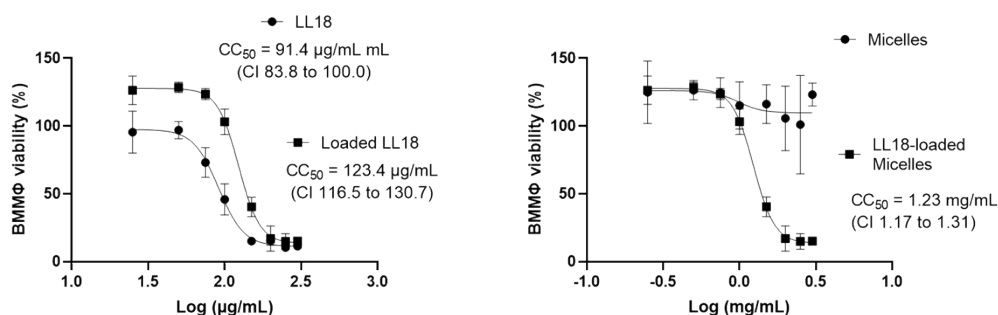

**Figure SI 2.** Dose-response (cell viability) curves for cells exposed for 24 h to different concentrations of free LLKKK18 (LL18), loaded-LL18, micelles and LL18-loaded micelles in: (A) MC3T3-E1 and B) BMMΦ, assessed by the MTT reduction assay, for half-maximal inhibitory concentration (CC<sub>50</sub>) calculation. Data are presented as mean ± standard deviation (n = 3).

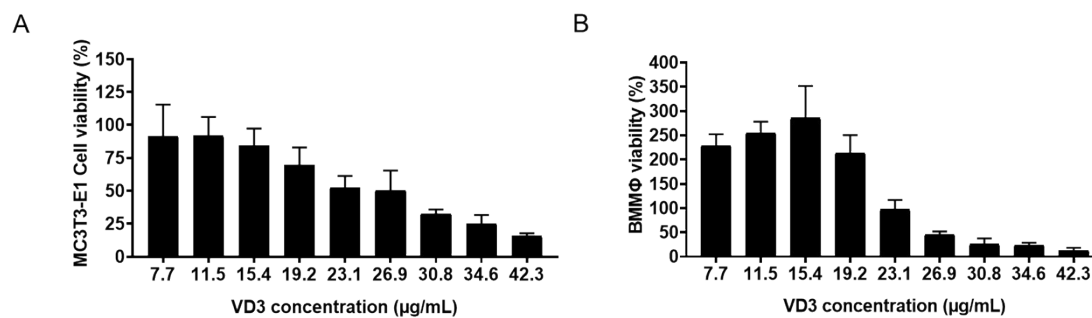

**Figure SI 3.** MTT assay dose-dependent cell viability in the MC3T3-E1 cell line (A) and in BMMΦ macrophages (B) after 24 hrs incubation with vitamin D3. Results are expressed as percentage of the negative control and are presented as mean  $\pm$  SD,  $n=3$ .

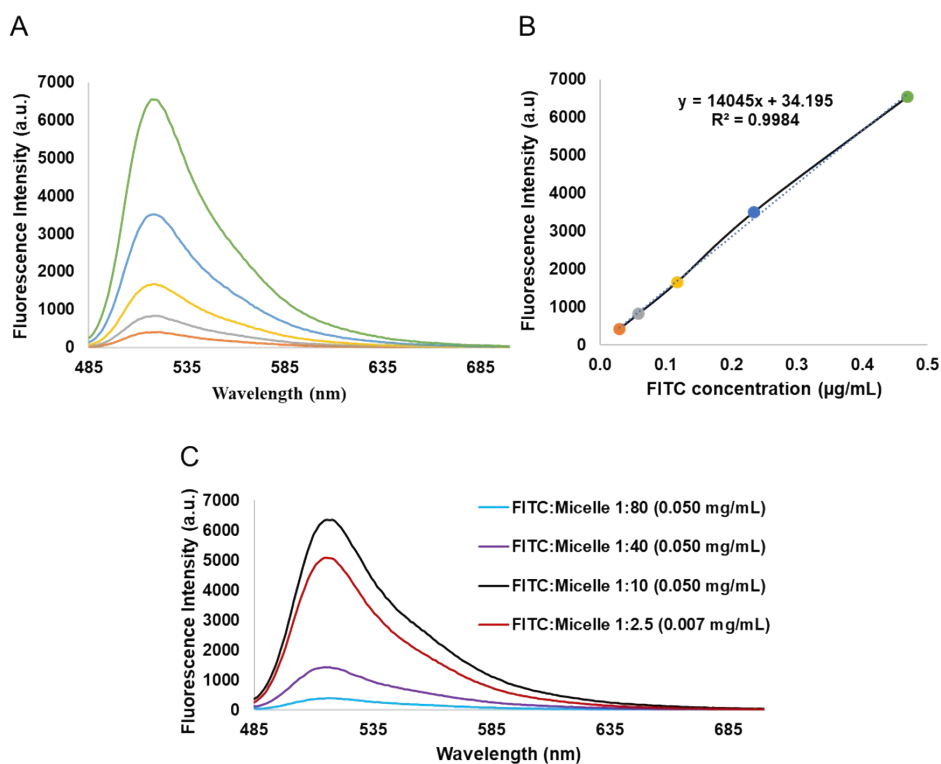

**Figure SI 4.** Micelle-conjugated fluorescein isothiocyanate (FITC) quantification FITC by fluorescence spectroscopy ( $\lambda_{ex477}/\lambda_{em517}$ ): (A) spectral scanning curves of five different pure FITC concentrations, (B) FITC standard curve and (C) spectral scanning curves of four different FITC-VD3-Dex production ratios. Concentrated stock solutions of pure FITC and FITC-VD3-Dex were prepared in DMSO and then serially diluted in PBS solution up to a fluorescent signal that could fit within the calibration curve range.

**Table SI 1.** Dynamic light scattering measurements of unlabeled and FITC-labelled micelles, dissolved in PBS at a constant concentration of 1 mg/mL, and quantification of conjugated FITC by fluorescence spectroscopy ( $\lambda_{\text{ex}}477/\lambda_{\text{em}}517$ ). Results for LL18 or LL18-TAMRA-loaded micelles are also shown. Results are expressed as mean  $\pm$  SD (n=3).

| FITC:VD3DexSuc initial ratio (mg:mg) | Average size (nm) | PDI             | $\zeta$ -potential (mV) | FITC ( $\mu\text{g}$ )/mg of micelle | Initial LL18 ( $\mu\text{g}/\text{mL}$ ) | LL18 AE (%)    |
|--------------------------------------|-------------------|-----------------|-------------------------|--------------------------------------|------------------------------------------|----------------|
| Unlabelled micelles                  | 162.4 $\pm$ 8.9   | 0.17 $\pm$ 0.02 | - 35.2 $\pm$ 2.5        |                                      |                                          |                |
| 1:40                                 | 124.7 $\pm$ 2.7   | 0.18 $\pm$ 0.03 | - 19.7 $\pm$ 1.8        | 1.90 $\pm$ 0.08                      |                                          |                |
| Unlabelled micelles                  | 143.1 $\pm$ 4.6   | 0.21 $\pm$ 0.01 | - 26.1 $\pm$ 1.5        |                                      | 100                                      | 86.3 $\pm$ 0.4 |
| 1:40                                 | 147.8 $\pm$ 8.7   | 0.22 $\pm$ 0.01 | - 3.9 $\pm$ 0.1         |                                      | 25                                       | 100 $\pm$ 0.0  |
| 1:40                                 | 204.3 $\pm$ 10.9  | 0.41 $\pm$ 0.02 | - 8.9 $\pm$ 0.3         |                                      | 100                                      | 89.7 $\pm$ 0.1 |
| Unlabelled micelles                  | 142.5 $\pm$ 8.5   | 0.15 $\pm$ 0.03 | - 25.8 $\pm$ 2.1        |                                      | 25*                                      |                |
| 1:40                                 | 96.8 $\pm$ 4.2    | 0.12 $\pm$ 0.01 | - 14.8 $\pm$ 0.1        |                                      | 25*                                      |                |

LL18, LLKKK18; FITC, fluorescein isothiocyanate; PDI, polydispersity index; AE, association efficiency.

\*LL18-TAMRA (Based on LL18 AE % results, loading of LL18-TAMRA is assumed as 90 to 100 %).

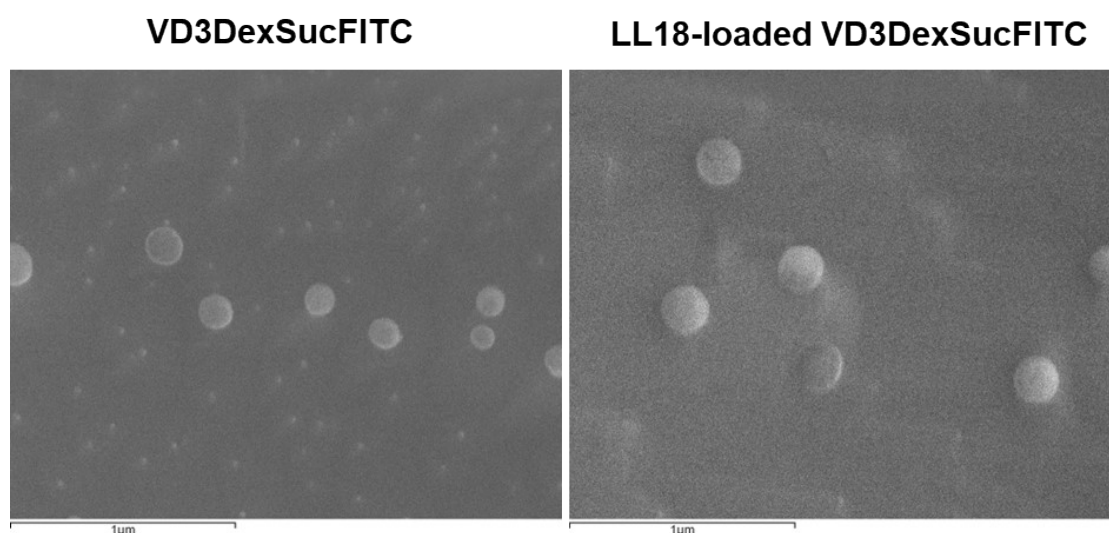

**Figure SI 5.** Representative Cryo-SEM microphotographs of (A) FITC-labelled micelles (1:40 mass ratio) and (B) LL18-loaded FITC-labelled micelles (100  $\mu\text{g}/\text{mL}$  of LL18/mg micelles), in PBS solution at 1 mg/mL (magnification of 50,000 $\times$ . Scale bars = 1  $\mu\text{m}$ ).

# LL18-TAMRA tracking after 1 h

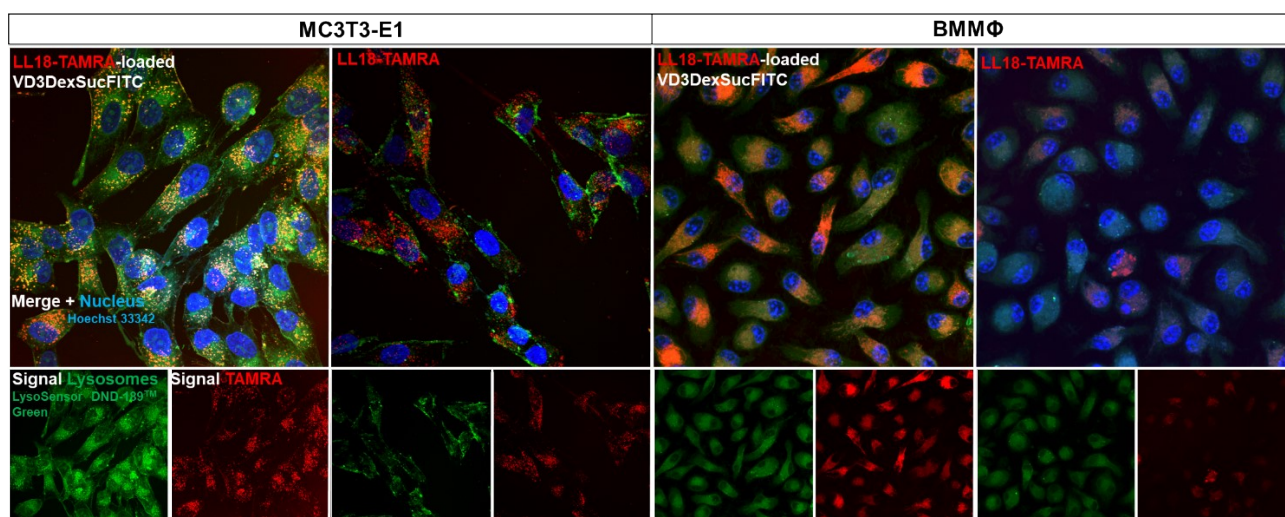

**Figure SI 6.** Subcellular localization analysis by confocal laser scanning microscopy (CLSM) of free and micelle-loaded LL18-TAMRA after 1 h incubation MC3T3-E1 (60x magnification) and BMMΦ (100x magnification). Formulation of 25 µg:1 mg peptide:micelle ratio, incubated at 0.5 mg/mL. Green signal refers to lysosome probe, red signal to TAMRA.

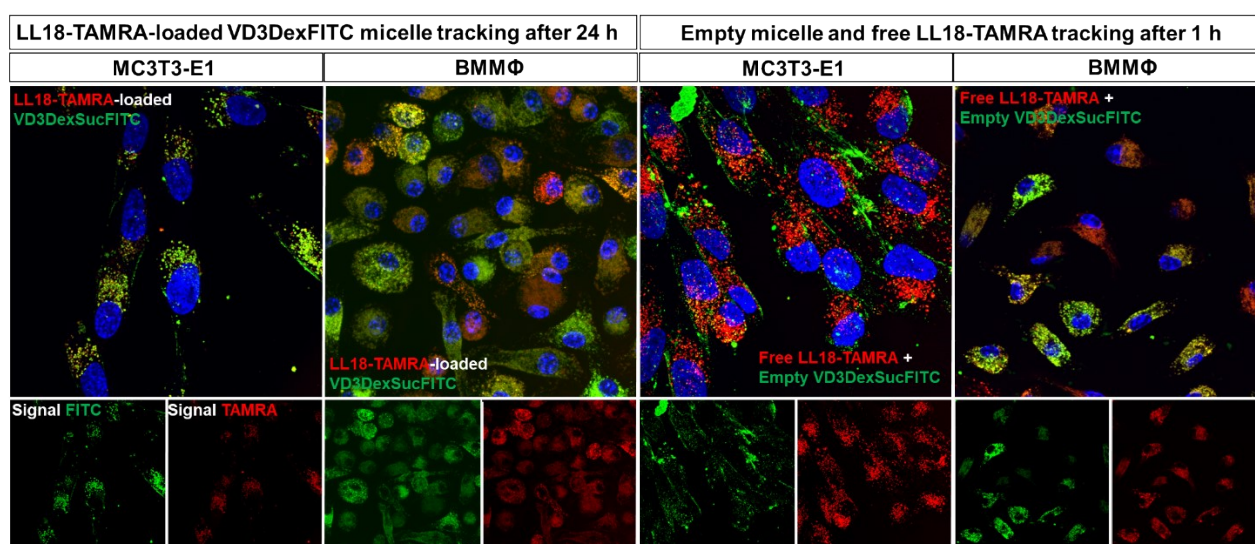

**Figure SI 7.** Subcellular localization analysis using a confocal laser scanning microscope (CLSM) of: (left) FITC-labelled micelles loaded with TAMRA-labelled LL18 after a 24 h incubation; and (right) free TAMRA-labelled LL18 and empty FITC-labelled micelles after 1 h incubation each, separately, in MC3T3-E1 (60x magnification) and BMMΦ (100x magnification). Formulation of 25 µg:1 mg (peptide:micelle ratio), incubated at 0.5 mg/mL. Lysosomes are not marked, green signal refers to FITC, red signal to TAMRA.

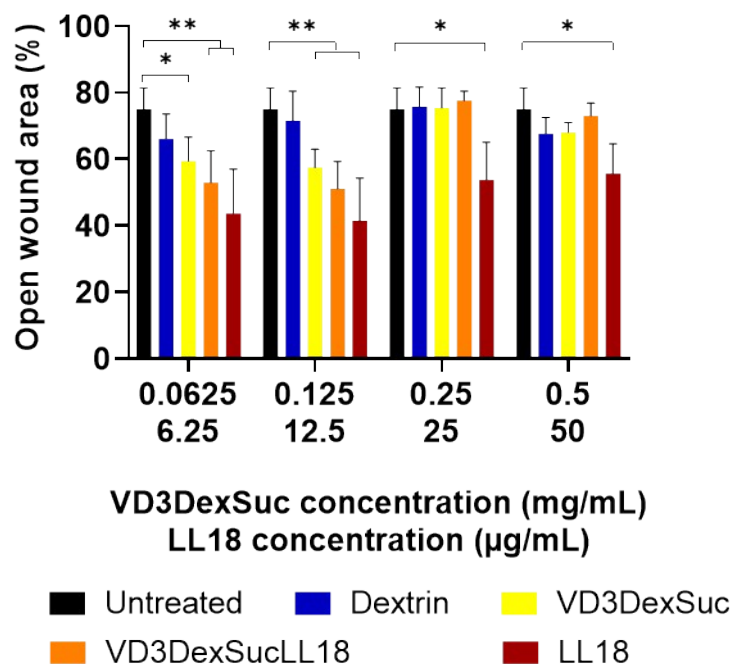

**Figure SI 8.** Quantification (%) of open wound area in MC3T3-E1 cells after 24h (n=6). Results presented as mean  $\pm$  SD (\*p < 0.05, \*\*p < 0.01, \*\*\*p < 0.001). Formulation of 100 $\mu$ g:1mg peptide:micelle ratio.

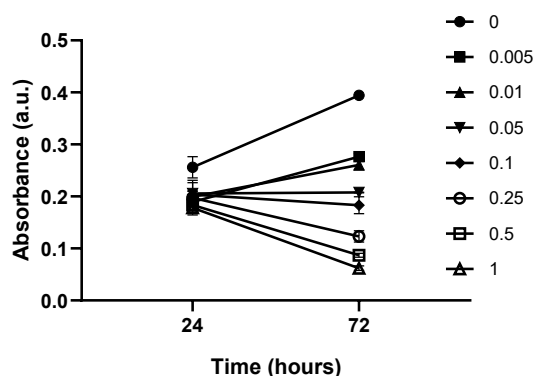

**Figure SI 9.** Dose( $\mu$ g/mL)-response results for MC3T3-E1 cells exposed up to 72 h to different concentrations of mitomycin C dissolved in culture medium, assessed by the MTT reduction assay. Typical cell seeding for this assay was reduced to a half ( $0.5 \times 10^5$  cell/mL) in order to provide space for a 72-h proliferation. Results were expressed in comparable absorbance values. A concentration of 0.05  $\mu$ g/mL was shown to inhibit cell proliferation whilst maintaining viability and, therefore, selected for the wound healing assay. Data are presented as mean  $\pm$  SD (n = 3).
